# Supplementary material
Source: PubMed Central journal article supplement (PMC4790768)
Supplement: sukd008023.w1_default.pdf [file sukd008023.w1_default.pdf]

**Supplementary table 1: The NICE Traffic light system for assessing the risk of serious illness in children with fever<sup>1</sup>**

|             | Green-low risk                                                                                                           | Amber-intermediate risk                                                                                                                                     | Red-high risk                                                                                                                                                                                                                                               |
|-------------|--------------------------------------------------------------------------------------------------------------------------|-------------------------------------------------------------------------------------------------------------------------------------------------------------|-------------------------------------------------------------------------------------------------------------------------------------------------------------------------------------------------------------------------------------------------------------|
| Colour      | Normal colour of skin , lips, and tongue                                                                                 | Pallor reported by parent/carer                                                                                                                             | Pale/mottled/ashen blue                                                                                                                                                                                                                                     |
| Activity    | Responds normally to social cues<br>Content/smiles<br><br>Stays awake or awakens quickly<br>Strong normal cry/not crying | Not responding normally to social cues<br>Wakes only with prolonged stimulation<br>Decreased activity<br><br>No smile                                       | No response to social cues<br><br>Appears ill to a healthcare professional<br>Does not wake or if roused does not stay awake<br>Weak/high pitched/continuous cry                                                                                            |
| Respiratory |                                                                                                                          | Nasal flaring<br>Tachypnoea:<br>RR >50breaths/min, age 6-12 months<br>RR >40 breaths /min, age >12 months<br>Oxygen saturation ≤ 95% in air<br><br>Crackles | Grunting<br>Tachypnoea:<br>RR >60 breaths /min<br><br>Moderate or severe chest indrawing                                                                                                                                                                    |
| Hydration   | Normal skin and eyes<br>Moist mucous membranes                                                                           | Dry mucous membrane<br>Poor feeding in infants<br>CRT ≥3 s<br>Reduced urine output                                                                          | Reduced skin turgor                                                                                                                                                                                                                                         |
| Other       | None of the amber or red symptoms or signs                                                                               | Fever for ≥5 days<br><br>Swelling of limb or joint<br>Non-weight bearing limb or not using an extremity<br><br>A new lump >2 cm                             | Age 0-3 months, temperature ≥38 <sup>0</sup> C<br>Age 3-6 months, temperature ≥39 <sup>0</sup> C<br>Non blanching rash<br>Bulging fontanelle<br>Neck stiffness<br>Status epilepticus<br>Focal neurological signs<br>Focal seizures<br>Bile stained vomiting |

CRT, capillary refill time; RR respiratory rate.

Children with features in the red column are at high risk of serious illness. Children with any features in the amber column and none in the red column are at intermediate risk of serious illness. Those with features in the green column, and none in the amber or red columns, are at low risk.

### Reference

1. National Collaborating Centre for Women's and Children's Health. *Feverish illness in children: assessment and initial management in children younger than five years*. London: RCOG Press, 2007:<http://www.nice.org.uk/CG047fullguideline>.
