# Supplementary material
Source: PubMed Central journal article supplement (PMC4790768)
Supplement: sukd008023.w4_default.pdf [file sukd008023.w4_default.pdf]

**Supplementary table 4: Proportion of children who had urinalysis according to patient characteristics**

|                                          | Total number of illnesses | Urinalysis done |      |
|------------------------------------------|---------------------------|-----------------|------|
|                                          |                           | n               | %    |
| <b>Overall</b>                           | 15781                     | 3653            | 23.1 |
| <b>Age (months)</b>                      |                           |                 |      |
| <3                                       | 748                       | 229             | 30.6 |
| 3-5                                      | 925                       | 244             | 26.4 |
| 6-11                                     | 2995                      | 696             | 23.2 |
| 12-23                                    | 4865                      | 834             | 17.1 |
| 24-35                                    | 2855                      | 533             | 18.7 |
| 36-47                                    | 1971                      | 619             | 31.4 |
| 48-60                                    | 1422                      | 498             | 35.0 |
| <b>Gender</b>                            |                           |                 |      |
| Male                                     | 6967                      | 1952            | 28.0 |
| Female                                   | 8814                      | 1701            | 19.3 |
| <b>Highest recorded temperature (°C)</b> |                           |                 |      |
| ≤37.9                                    | 3446                      | 473             | 13.7 |
| 38-38.9                                  | 5624                      | 1226            | 21.8 |
| 39-39.9                                  | 4994                      | 1373            | 27.5 |
| ≥40                                      | 1717                      | 581             | 33.8 |
| <b>Triage category</b>                   |                           |                 |      |
| 1                                        | 30                        | 16              | 53.3 |
| 2                                        | 453                       | 135             | 29.8 |
| 3                                        | 4894                      | 1200            | 24.5 |
| 4                                        | 6936                      | 1632            | 23.5 |
| 5                                        | 3468                      | 670             | 19.3 |
| <b>NICE category</b>                     |                           |                 |      |
| Red                                      | 4066                      | 1082            | 26.6 |
| Amber                                    | 7373                      | 1686            | 22.7 |
| Green                                    | 4342                      | 885             | 20.4 |
| <b>Admission to hospital</b>             |                           |                 |      |
| Admitted                                 | 1912                      | 697             | 36.5 |
| Not admitted                             | 13869                     | 2956            | 21.3 |
| <b>Provisional diagnoses</b>             |                           |                 |      |
| Viral infections                         | 5940                      | 1394            | 23.5 |

|                                     |      |     |      |
|-------------------------------------|------|-----|------|
| Gastroenteritis                     | 2186 | 507 | 23.2 |
| Asthma/croup/bronchiolitis          | 2125 | 91  | 4.3  |
| Focal infections*                   | 1586 | 212 | 13.4 |
| Other                               | 974  | 208 | 21.4 |
| Fever no focus                      | 1285 | 642 | 50.0 |
| Pneumonia                           | 641  | 125 | 19.5 |
| Febrile convulsion                  | 420  | 174 | 41.4 |
| Urinary tract infection             | 295  | 235 | 79.7 |
| Allergy                             | 244  | 29  | 11.9 |
| Sepsis                              | 45   | 19  | 42.2 |
| Meningitis                          | 22   | 13  | 59.1 |
| Kawasaki disease                    | 13   | 4   | 30.8 |
| Osteomyelitis                       | 5    | 0   | 0    |
| <b>Serious bacterial infections</b> |      |     |      |
| Urinary tract infection             | 543  | 362 | 66.7 |
| Pneumonia                           | 533  | 118 | 22.1 |
| Bacteraemia                         | 64   | 27  | 42.2 |
| Meningitis                          | 8    | 1   | 12.5 |
| osteomyelitis                       | 12   | 3   | 25.0 |
| Septic arthritis                    | 6    | 2   | 33.3 |
| ≥2 Serious bacterial infections     | 44   | 20  | 45.5 |

\* Lymphadenitis, tonsillitis, otitis media, and cellulitis
